# Supplementary material for: Structure reorganization-controlled electron transfer of bipyridine derivatives as organic redox couples
Source: Royal Society of Chemistry journal article supplement (doi:10.1039/c9ta08910a), 2019-01-01
Supplement: c9ta08910a1.pdf [file c9ta08910a1.pdf]

## Supporting Information

### Structure reorganization-controlled electron transfer of bipyridine derivatives as organic redox couples

*Yang Lv,<sup>a</sup> Yiyang Liu,<sup>a</sup> Ting Feng,<sup>a</sup> Jin Zhang,<sup>a</sup> Shanfu Lu,<sup>a</sup> Haining Wang<sup>\*a b</sup> and Yan Xiang<sup>\*a</sup>*

<sup>a</sup>Beijing Key Laboratory of Bio-inspired Energy Materials and Devices, School of Space and Environment, Beihang University, Beijing 100191, P. R. China. E-mail: hwang@buaa.edu.cn; xiangy@buaa.edu.cn

<sup>b</sup>Department of Chemistry, University of Central Florida, Orlando, FL 32816, USA

## Table of Contents

|                                                                                                     |       |
|-----------------------------------------------------------------------------------------------------|-------|
| The $^1\text{H-NMR}$ spectra of $\text{DQ}^{2+}$ , $\text{MV}^{2+}$ and $\text{DM}^{2+}$            | 3-5   |
| Electrochemical measurement and schematic diagram for reorganization energy theoretical calculation | 6-11  |
| Physical property of $\text{DQ}^{2+}$ , $\text{MV}^{2+}$ and $\text{DM}^{2+}$                       | 12    |
| Single cell test                                                                                    | 13-18 |
| References                                                                                          | 19    |

# $^1\text{H}$ -NMR spectra of $\text{DQ}^{2+}$ , $\text{MV}^{2+}$ and $\text{DM}^{2+}$

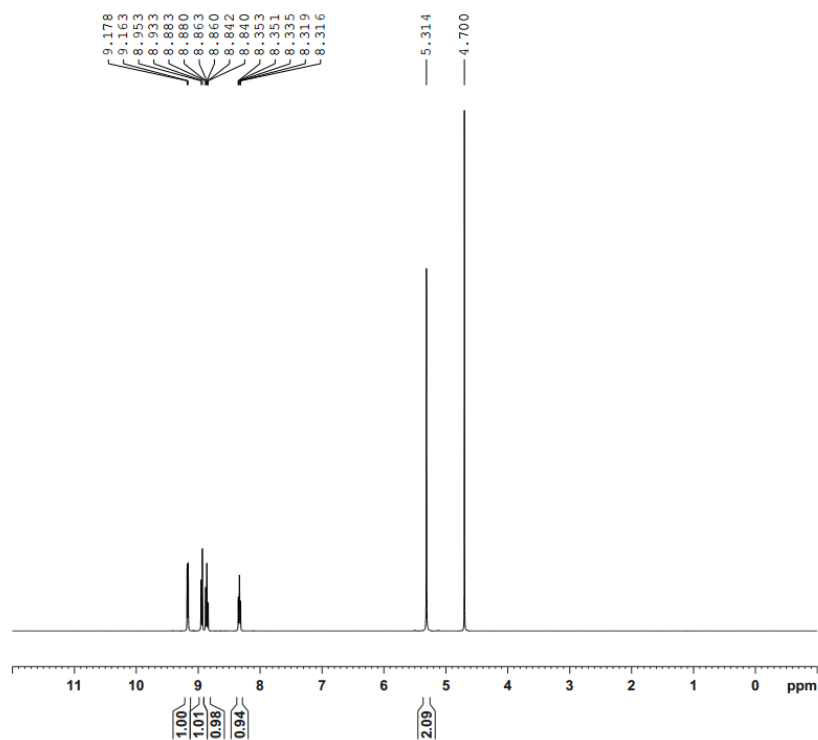

**Figure S1.**  $^1\text{H}$  NMR spectrum of  $\text{DQ}^{2+}$ .  $^1\text{H}$  NMR (400 MHz,  $\text{D}_2\text{O}$ )  $\delta = 9.17$  (d,  $J=6.0$ , 2H), 8.94 (d,  $J=8.0$ , 2H), 8.86 (td,  $J=8.1$ , 1.1, 2H), 8.38 – 8.29 (m, 2H), 5.31 (s, 2H).

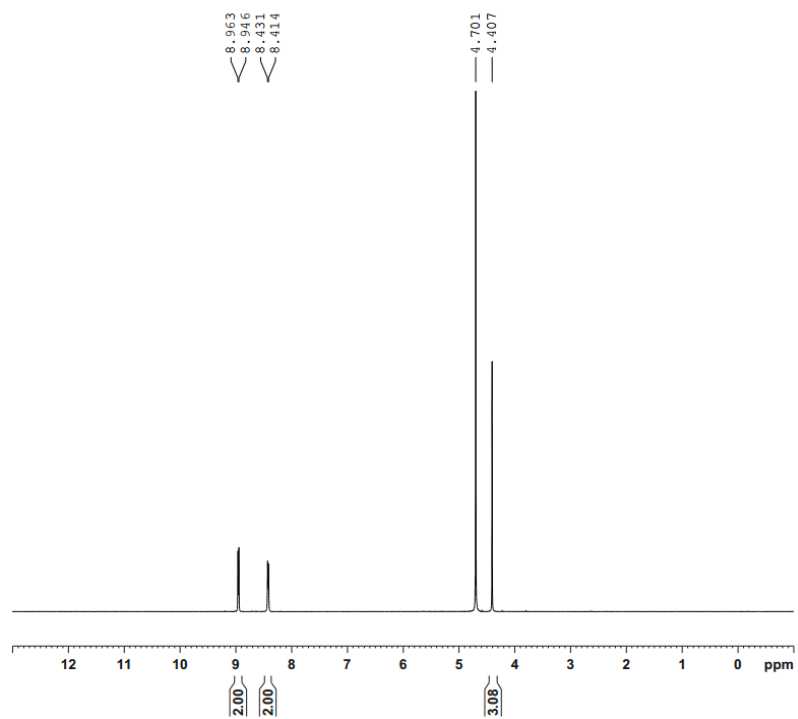

**Figure S2.** <sup>1</sup>H NMR spectrum of MV<sup>2+</sup>. <sup>1</sup>H NMR (400 MHz, D<sub>2</sub>O) δ = 8.95 (d, *J*=6.7, 2H), 8.42 (d, *J*=6.5, 2H), 4.41 (s, 3H).

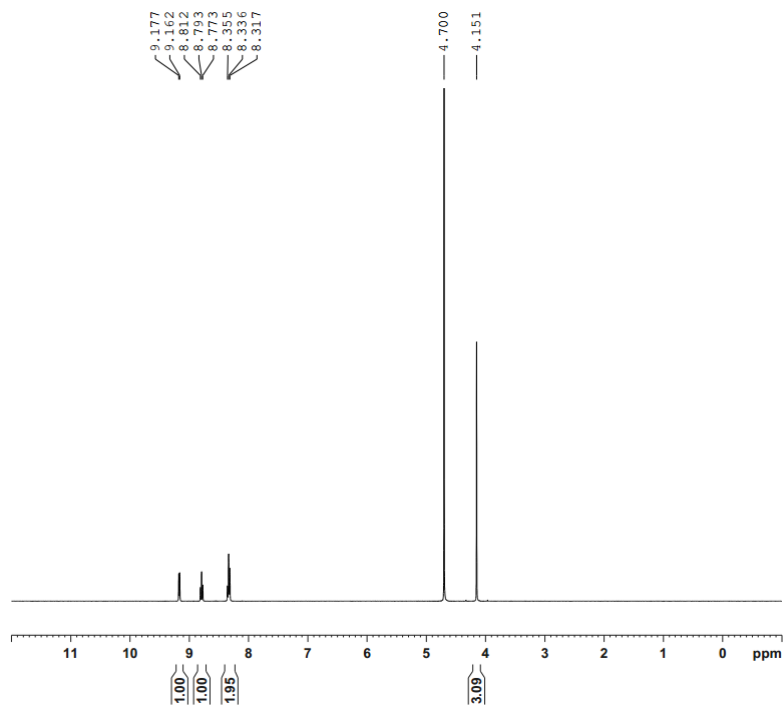

**Figure S3.** <sup>1</sup>H NMR spectrum of DM<sup>2+</sup>. <sup>1</sup>H NMR (400 MHz, D<sub>2</sub>O) δ = 9.17 (d, *J*=6.0, 2H), 8.79 (t, *J*=7.9, 2H), 8.34 (t, *J*=7.7, 4H), 4.15 (s, 6H).

## Electrochemical measurement and schematic diagram for reorganization energy theoretical calculation

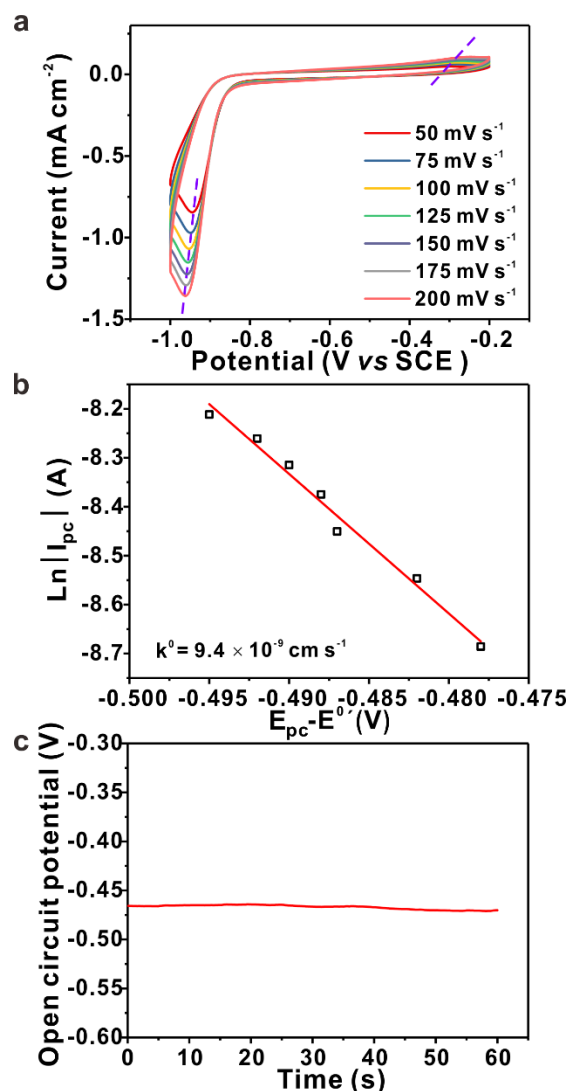

**Figure S4.** (a) The cyclic voltammograms curves of  $5 \text{ mmol L}^{-1} DM^{2+}$  in  $0.5 \text{ mol L}^{-1} \text{ NaCl}$  solution under different scanning rates. (b) The plots of napierian logarithm of cathodic peak current versus the difference between the cathodic potentials and formal potentials for  $DM^{2+}$ . (c) The open circuit potential of  $DM^{2+}$  in  $0.5 \text{ mol L}^{-1} \text{ NaCl}$  solution (the concentration of  $DM^{2+}$  and  $DM^{+}$  are both  $5 \text{ mmol L}^{-1}$ .)

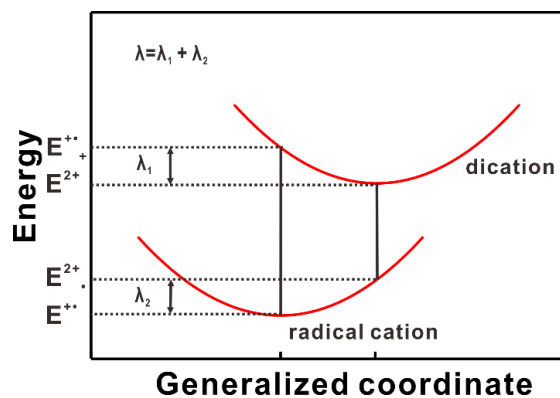

**Figure S5.** The schematic diagram for reorganization energy calculation based on Marcus-Hush theory.  $E^{+•}$  and  $E^{2+}$  are the energy of the radical cation molecule and dication molecule respectively.  $E^{2+•}$  is the energy of the radical cation molecule with the optimized geometry of the dication molecule, and  $E^{+•+}$  is the energy of the dication molecule with the optimized geometry of the radical cation molecule.

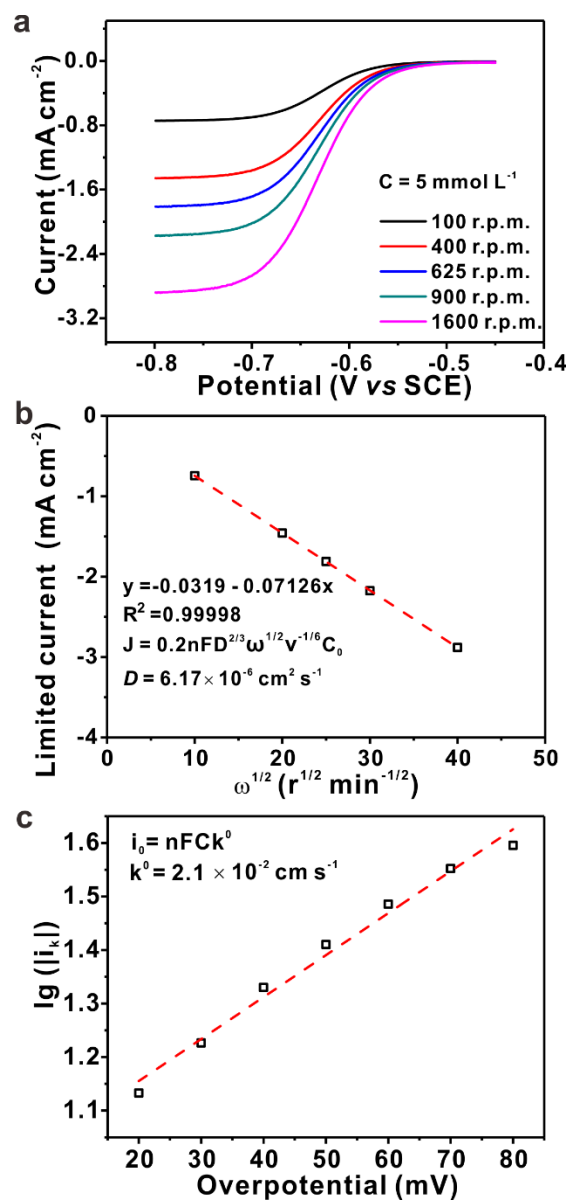

**Figure S6.** (a) The linear sweep voltammograms curves of 5 mmol L<sup>-1</sup> DQ<sup>2+</sup> in 0.5 mol L<sup>-1</sup> NaCl solution with the rotation rates varies from 100 to 1600 rpm. (b) The Levich plots of the limiting currents versus the square root of rotation rates for DQ<sup>2+</sup>. (c) The plots of logarithm of kinetic currents versus the over potentials and the corresponding fitted Tafel plots for DQ<sup>2+</sup>.



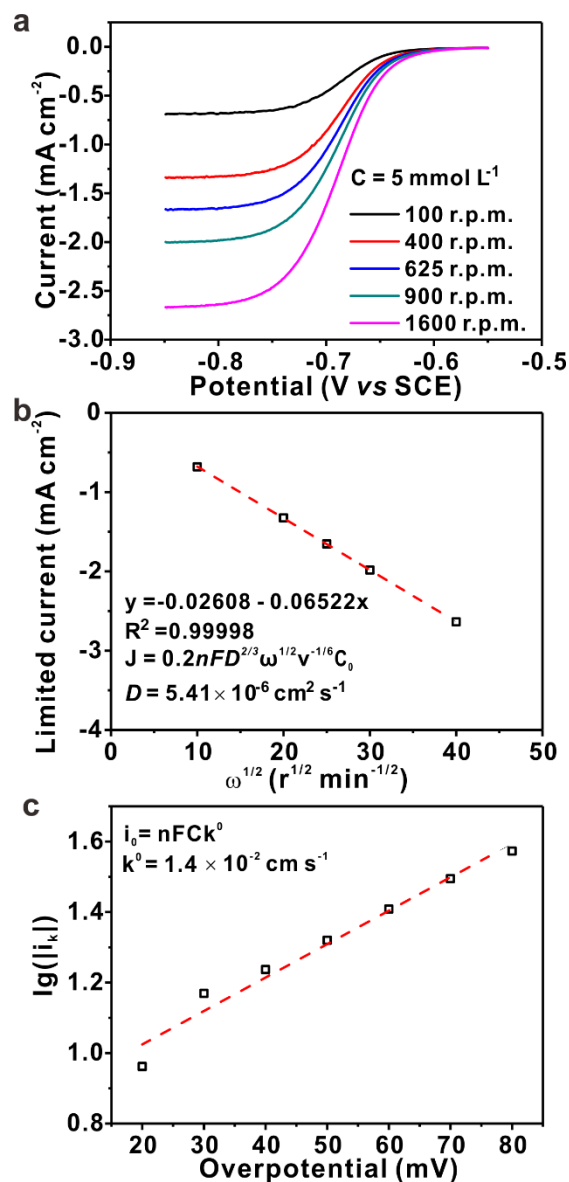

**Figure S7.** (a) The linear sweep voltammograms curves of  $5 \text{ mmol L}^{-1} \text{ MV}^{2+}$  in  $0.5 \text{ mol L}^{-1} \text{ NaCl}$  solution with the rotation rates varies from 100 to 1600 rpm. (b) The Levich plots of the limiting currents versus the square root of rotation rates for  $\text{MV}^{2+}$ . (c) The plots of logarithm of kinetic currents versus overpotentials and the corresponding fitted Tafel plots for  $\text{MV}^{2+}$ .

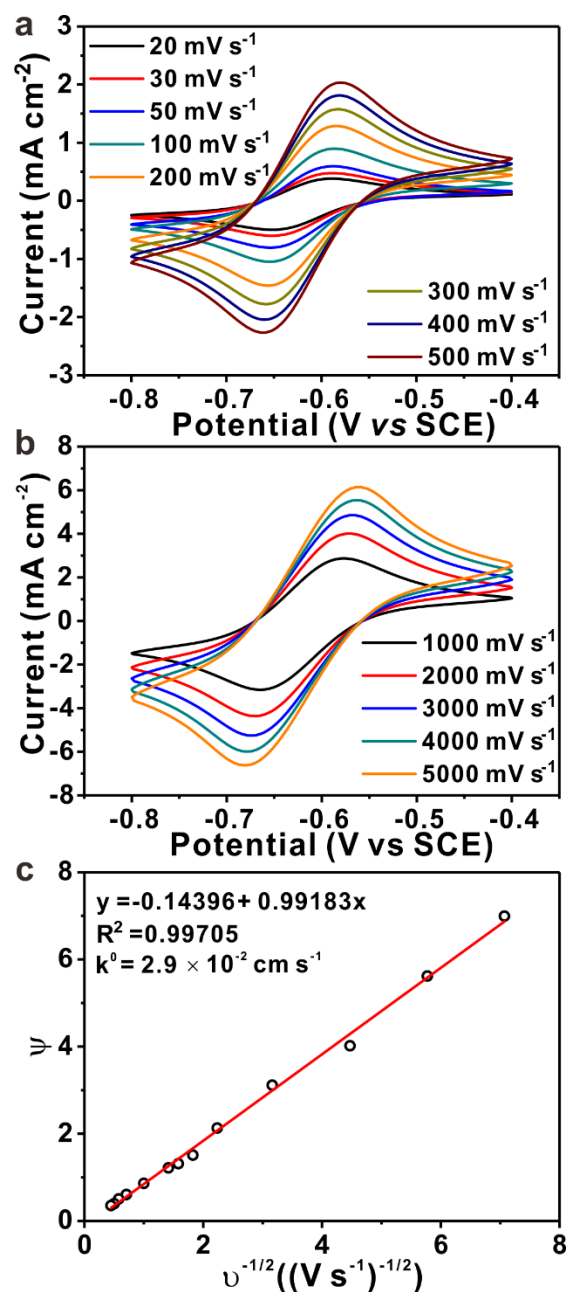

**Figure S8.** (a), (b) Cyclic voltammograms of 5 mmol L<sup>-1</sup> DQ<sup>2+</sup> in 0.5 mol L<sup>-1</sup> NaCl solutions at different scanning rates. (c) Plot of  $\Psi$  vs.  $v^{-1/2}$  toward DQ<sup>2+</sup> (The linear relationship was shown with scan rates of 20 to 5000 mV s<sup>-1</sup>).

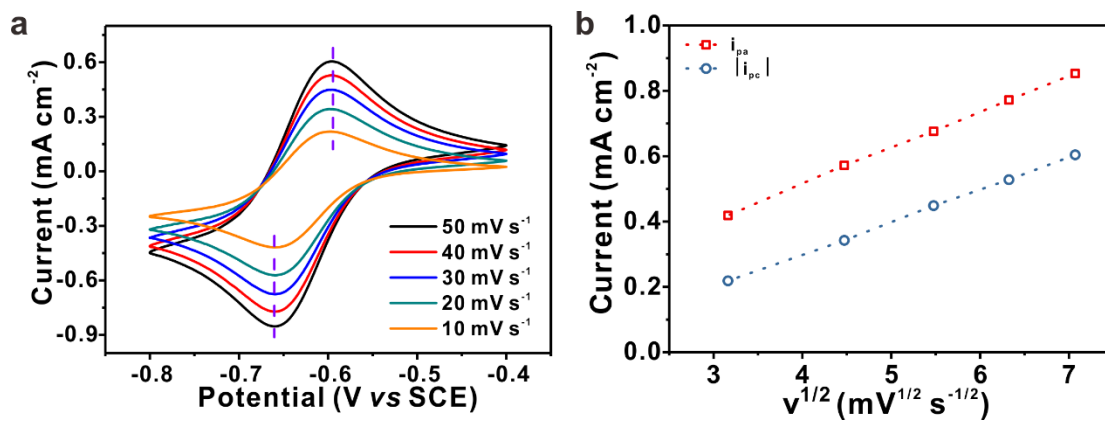

**Figure S9.** (a) The cyclic voltammograms curves of  $5 \text{ mmol L}^{-1} DQ^{2+}$  in  $0.5 \text{ mol L}^{-1} \text{ NaCl}$  solution under different scanning rates. (b) The variation peak currents as a function of the square root of the scan rates of  $DQ^{2+}$ .

## Physical property of $DQ^{2+}$ , $MV^{2+}$ and $DM^{2+}$

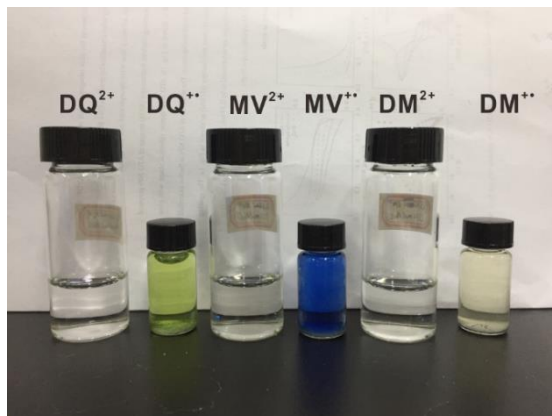

**Figure S10.** The photograph of  $0.0325 \text{ mmol L}^{-1}$   $DQ^{2+}$ ,  $MV^{2+}$ ,  $DM^{2+}$  and their monocation radicals species.

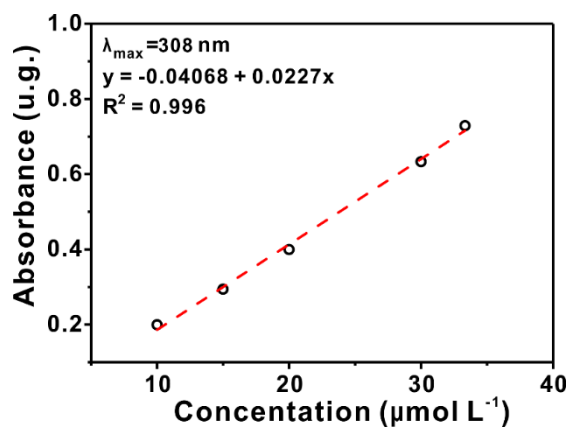

**Figure S11.** The standard curves of  $DQ^{2+}$  by UV-Vis spectrophotometry measurements.

## Single cell test

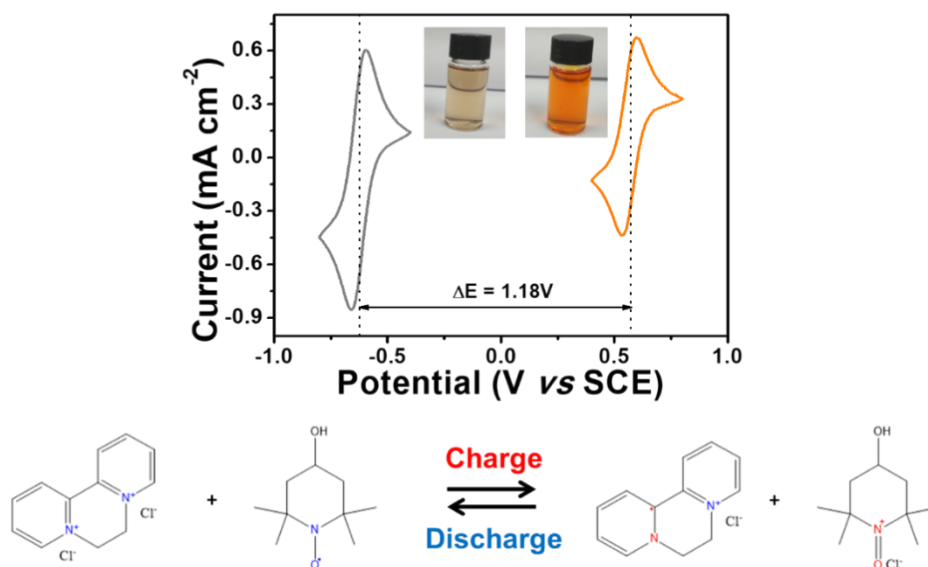

**Figure S12.** A schematic of the DQ<sup>2+</sup>/ 4-HO-TEMPO total neutral-aqueous organic redox flow battery.

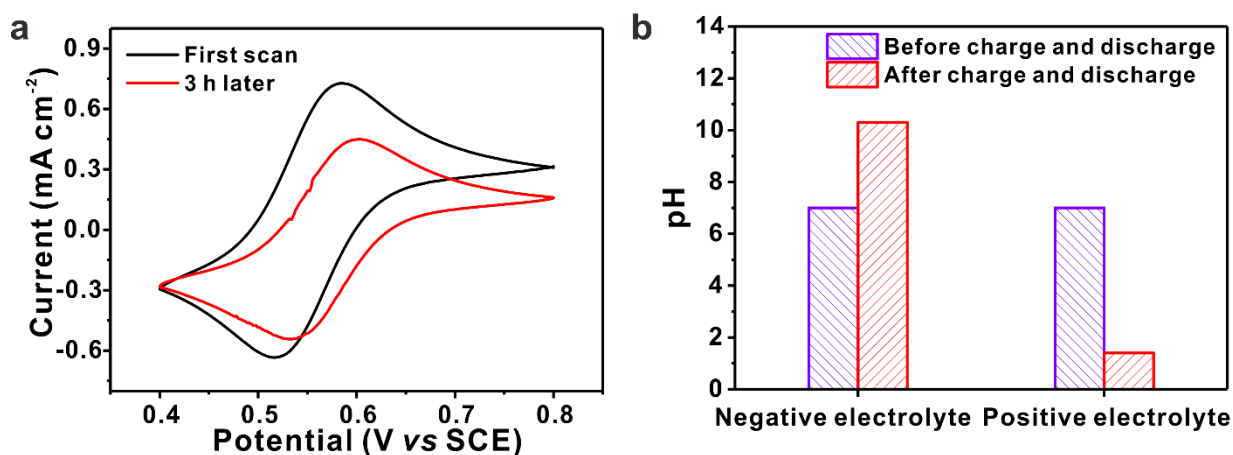

**Figure S13.** (a) The cyclic voltammograms curves of 5 mmol L<sup>-1</sup> 4-OH-TEMPO in 0.5 mol L<sup>-1</sup> H<sub>2</sub>SO<sub>4</sub> solutions. (b) The pH values of electrolyte during 150 cycles (Negative electrolyte: 0.2 mol L<sup>-1</sup> DQ<sup>2+</sup> + 1.0 mol L<sup>-1</sup> NaCl; Positive electrolyte: 0.2 mol L<sup>-1</sup> 4-OH-TEMPO + 1.0 mol L<sup>-1</sup> NaCl).

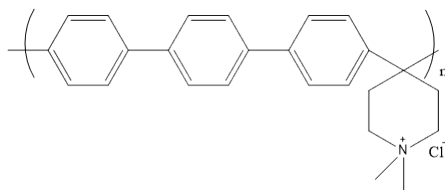

**Figure S14.** The molecular formula of the anion exchange membrane.

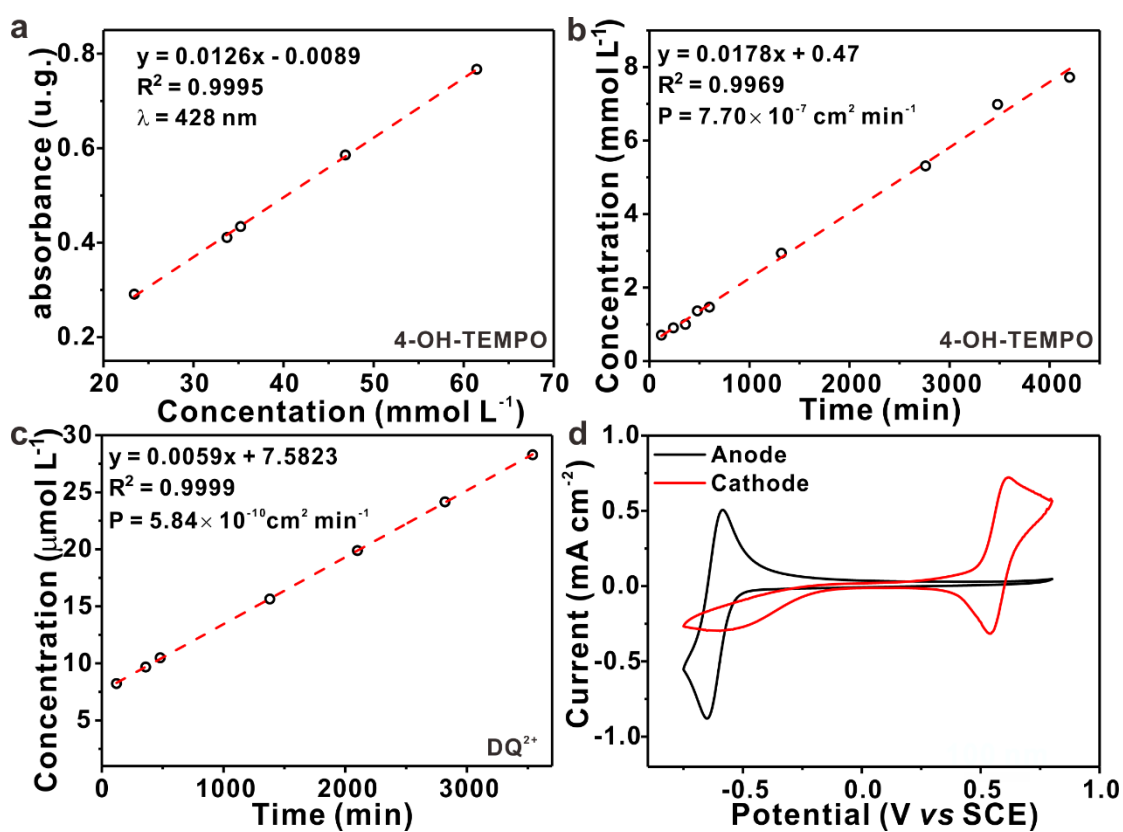

**Figure S15.** (a) The standard curves of 4-OH-TEMPO by UV-Vis spectrophotometry measurements. (b) Concentration of 4-OH-TEMPO in NaCl solution varied with time for QAPPT membrane. (c) Concentration of DQ<sup>2+</sup> in NaCl solution varied with time for QAPPT membrane. (d) Post-cycling CV analysis of anode and cathode solutions after 50 cycles. (Active material in each anode or cathode electrolyte diluted to 5 mmol L<sup>-1</sup>)

in 0.5 mol L<sup>-1</sup> NaCl supporting electrolyte, 50 mV s<sup>-1</sup> scan rate, glassy carbon working electrode, glassy carbon counter electrode, saturated calomel reference electrode.)

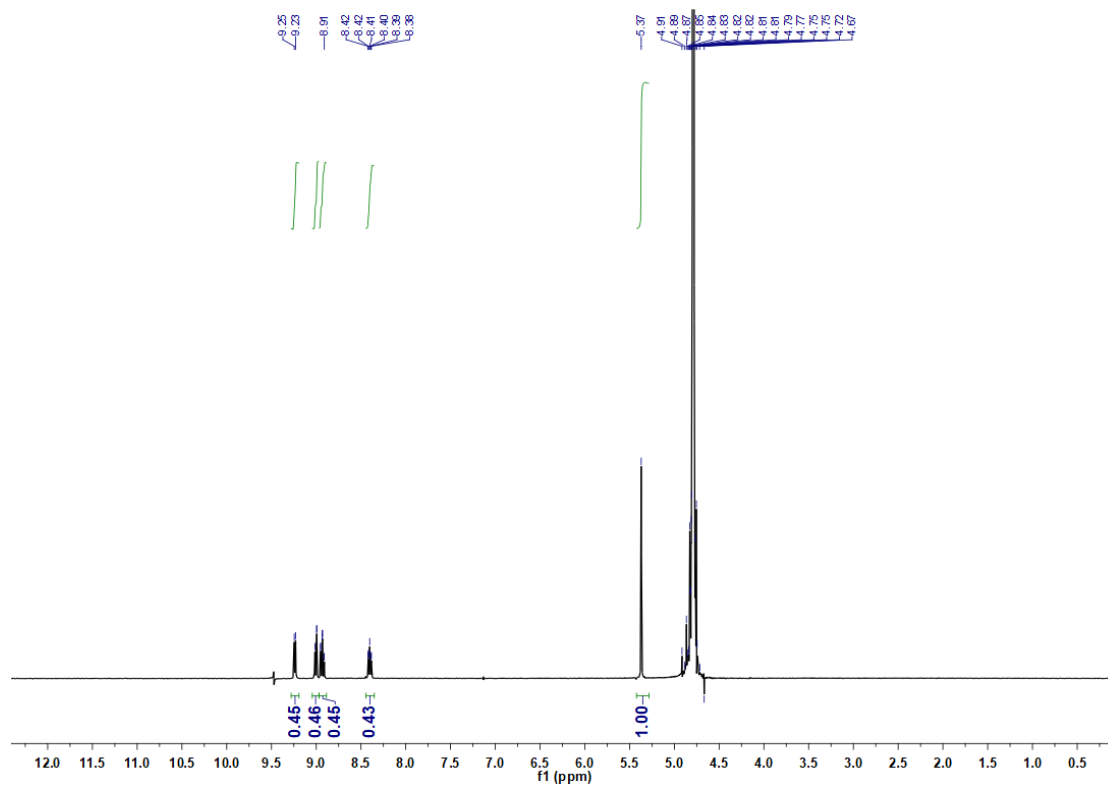

**Figure S16.** Post-cycling <sup>1</sup>H NMR analysis of anode electrolyte after 50 cycles. (50 μL electrolyte diluted into 1000 μL D<sub>2</sub>O. Residual H<sub>2</sub>O from the electrolyte causes a strong solvent absorption at 4.79 ppm. The signal intensity in anode electrolyte was increased to show no detectable 4-OH-TEMPO within the noise threshold of the instrument. Besides, there is no impurity peak detected in the anode electrolyte, which means DQ<sup>2+</sup> is stable in single cell test.)

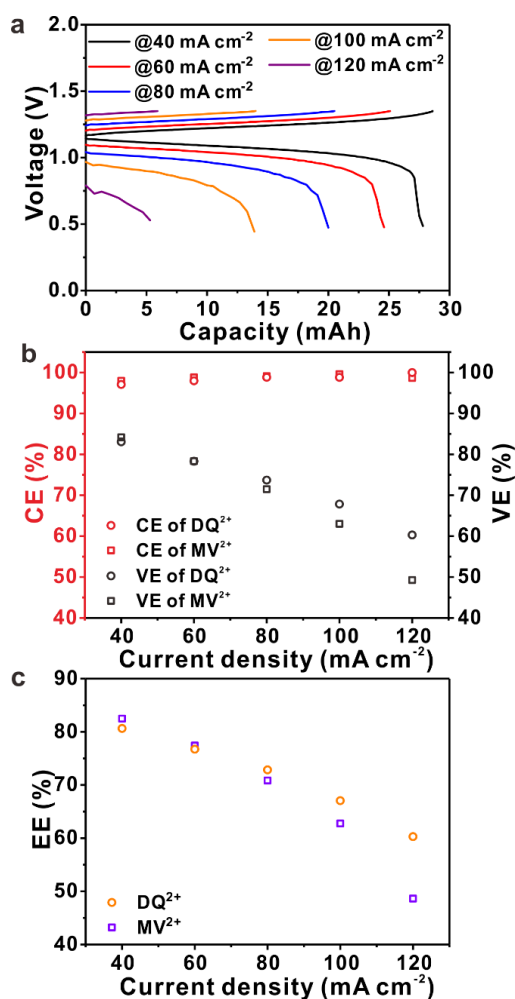

**Figure S17.** The cell performance with 0.2 mol L<sup>-1</sup> MV<sup>2+</sup> + 1 mol L<sup>-1</sup> NaCl + 0.025 mol L<sup>-1</sup> NaH<sub>2</sub>PO<sub>4</sub> as negative electrolyte and 0.2 mol L<sup>-1</sup> 4-OH-TEMPO + 1 mol L<sup>-1</sup> NaCl + 0.025 mol L<sup>-1</sup> NaH<sub>2</sub>PO<sub>4</sub> as positive electrolyte (a) The charge and discharge curves for the AORFBs of MV<sup>2+</sup> at different current densities. (b) and (c) The columbic efficiency (CE), voltage efficiency (VE) and energy efficiency (EE) of the AORFBs of DQ<sup>2+</sup> or MV<sup>2+</sup> in different current densities.

**Table S1.** The compare among the viologen derivatives and 2,2'-bipyridine derivatives used in aqueous redox flow battery



| Negative Electrolyte                                                                  | Positive Electrolyte                                                                  | Volta ge(V)   | D of negative material (cm <sup>2</sup> ·s <sup>-1</sup> ) | k <sup>0</sup> of negative material (cm·s <sup>-1</sup> ) | Realized Energy Density of ( Wh L <sup>-1</sup> ) | Cycle times            | Capacity Retention /Cycle (%) | Energy efficiency (%)             | Ref |
|---------------------------------------------------------------------------------------|---------------------------------------------------------------------------------------|---------------|------------------------------------------------------------|-----------------------------------------------------------|---------------------------------------------------|------------------------|-------------------------------|-----------------------------------|-----|
| 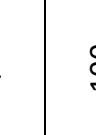     |    | 1.25          | 2.5×10 <sup>-5</sup>                                       | 2.8×10 <sup>-4</sup>                                      | ~6.4<br>@40mA cm <sup>-2</sup>                    | 100<br>(0.1 M/ 0.1 M)  | ~99.99                        | ~45<br>@100 mA cm <sup>-2</sup>   | 1   |
|                                                                                       |                                                                                       |               |                                                            |                                                           |                                                   | 100<br>(0.5 M/ 0.5 M)  | 99.88                         | ~43<br>@100 mA cm <sup>-2</sup>   |     |
|    |  | 1.4           | 5.7×10 <sup>-6</sup>                                       | 3.3×10 <sup>-3</sup>                                      | 38<br>@25mA cm <sup>-2</sup>                      | 100<br>(2.0 M/ 2.0 M)  | ~99.963                       | ~62.5<br>@100 mA cm <sup>-2</sup> | 2   |
|  |  | 0.75          | 3.3×10 <sup>-6</sup>                                       | 2.2×10 <sup>-2</sup>                                      | 13<br>@25mA cm <sup>-2</sup>                      | 500<br>(0.75 M/ 1.0 M) | 99.9989                       | ~44<br>@100 mA cm <sup>-2</sup>   | 3   |
|  |  | 1<br><br>1.38 | 5.4×10 <sup>-6</sup><br>5.3×10 <sup>-6</sup>               | > 0.36<br>> 0.36                                          | 7.1<br>@40mA cm <sup>-2</sup>                     | 50<br>(0.25 M/ 0.5 M)  | 99.82                         | 45<br>@100 mA cm <sup>-2</sup>    | 4   |

|                                                                                       |                                                                                       |      |                         |                        |                                |                       |       |                                  |           |
|---------------------------------------------------------------------------------------|---------------------------------------------------------------------------------------|------|-------------------------|------------------------|--------------------------------|-----------------------|-------|----------------------------------|-----------|
|    |    | 1.44 | 3.15 × 10 <sup>-6</sup> | > 0.28                 | ~8.0<br>@40mA cm <sup>-2</sup> | 50<br>(0.25 M/ 0.5 M) | 99.94 | ~39<br>@100 mA cm <sup>-2</sup>  | 5         |
|    | KI                                                                                    | 1.0  | 3.26 × 10 <sup>-6</sup> | > 0.28                 | ~6.0<br>@60mA cm <sup>-2</sup> | 300<br>(0.5 M/ 2 M)   | 99.99 | 38<br>@100 mA cm <sup>-2</sup>   | 6         |
|    | KBr                                                                                   | 1.49 | 5.19 × 10 <sup>-6</sup> | > 0.36                 | 36.4<br>@40mA cm <sup>-2</sup> | 200<br>(0.1 M/ 2 M)   | N/A   | 67.4<br>@100 mA cm <sup>-2</sup> | 7         |
|                                                                                       |                                                                                       | 1.89 | 3.99 × 10 <sup>-6</sup> | > 0.31                 |                                |                       |       |                                  |           |
|  |  | 1.12 | 4.6 × 10 <sup>-6</sup>  | 6.4 × 10 <sup>-3</sup> | ~4.4<br>@5mA cm <sup>-2</sup>  | 100<br>(0.5M/0.5M)    | 99.8  | ~85<br>@5 mA cm <sup>-2</sup>    | 8         |
|  |  | 1.18 | 6.2 × 10 <sup>-6</sup>  | 2.1 × 10 <sup>-2</sup> | 2.5<br>@40mA cm <sup>-2</sup>  | 100<br>(0.2M/0.2M)    | 99.95 | 67<br>@100 mA cm <sup>-2</sup>   | This work |

## References

1. T. Liu, X. Wei, Z. Nie, V. Sprenkle and W. Wang, *Adv. Energy Mater.*, 2016, **6**, 1501449.
2. T. Janoschka, N. Martin, M. D. Hager and U. S. Schubert, *Angew. Chem. Int. Ed.*, 2016, **55**, 14427-14430.
3. E. S. Beh, D. De Porcellinis, R. L. Gracia, K. T. Xia, R. G. Gordon and M. J. Aziz, *ACS Energy Lett.*, 2017, **2**, 639-644.
4. C. DeBruler, B. Hu, J. Moss, X. Liu, J. Luo, Y. Sun and T. L. Liu, *Chem*, 2017, **3**, 961-978.
5. J. Luo, B. Hu, C. Debruler and T. L. Liu, *Angew. Chem. Int. Ed.*, 2018, **57**, 231-235.
6. C. DeBruler, B. Hu, J. Moss, J. Luo and T. L. Liu, *ACS Energy Lett.*, 2018, **3**, 663-668.
7. W. Liu, Y. Liu, H. Zhang, C. Xie, L. Shi, Y. G. Zhou and X. Li, *Chem Commun*, 2019, **55**, 4801-4804.
8. J. Huang, Z. Yang, V. Murugesan, E. Walter, A. Hollas, B. Pan, R. S. Assary, I. A. Shkrob, X. Wei and Z. Zhang, *ACS Energy Lett.*, 2018, **3**, 2533-2538.
